# Supplementary material for: Development and Validation of an Analytical Method for the Simultaneous Detection of Sulfonamides, Trimethoprim and Dapsone in Honey by Liquid Chromatography-Tandem Mass Spectrometry
Source: Preprints.org preprint supplement (doi:10.20944/preprints202312.1801.v2), 2024-03-25
Supplement: Supplementary file 1 [file supplementary]

Table S2. The values of performance parameters obtained through the internal validation of the method

| Compound               | Level of compound<br>(µg/kg)(MRPL) | HONEY SAMPLES        |         |                                                              |                                                 |              |        |        |                        |                        |                                  |      |                                 |
|------------------------|------------------------------------|----------------------|---------|--------------------------------------------------------------|-------------------------------------------------|--------------|--------|--------|------------------------|------------------------|----------------------------------|------|---------------------------------|
|                        |                                    | Linearity            |         | Limit of detection/<br>Limit of<br>quantification<br>(µg/kg) | CC <sub>α</sub> / CC <sub>β</sub><br>(µg/kg)    | Recovery (%) |        |        | Repeatability<br>(%)   | Reproducibility (%)    | Robustness                       |      | Uncertainty<br>(k=2)(µg/kg)     |
|                        |                                    | R <sup>2</sup> ≥0,99 | RSD<15% | LOD<MRPL;<br>LOQ<MRPL                                        | CC <sub>α</sub> <MRPL;<br>CC <sub>β</sub> <MRPL | 80%<R<120%   |        |        | RSD <sub>r</sub> ≤ 20% | RSD <sub>R</sub> ≤ 20% | S <sub>Di</sub> < S <sub>R</sub> |      | U <sub>c</sub> < U <sub>f</sub> |
|                        |                                    |                      |         |                                                              |                                                 | Min.         | Medie  | Max.   |                        |                        |                                  |      |                                 |
| Sulfaguanidine         | 50*                                | 0,998962             | 7,335   | 1,020/3,060                                                  | 3,50 / 4,33                                     | 93,52        | 99,99  | 103,99 | 2,65                   | 3,08                   | 1,42                             | 1,55 | 8,772                           |
| Sulfacetamide          | 50*                                | 0,996751             | 7,574   | 1,095/3,285                                                  | 2,44 / 3,02                                     | 96,07        | 100,36 | 103,79 | 2,55                   | 2,85                   | 1,05                             | 1,42 | 8,618                           |
| Sulfanilamide          | 50*                                | 0,996611             | 11,280  | 12,50/37,50                                                  | 22,12 / 27,36                                   | 96,09        | 99,87  | 105,96 | 3,26                   | 3,34                   | 1,28                             | 1,67 | 12,310                          |
| Sulfisomidine          | 50*                                | 0,998490             | 6,519   | 0,066/0,198                                                  | 7,78 / 9,62                                     | 92,84        | 100,25 | 104,31 | 3,42                   | 3,47                   | 1,72                             | 1,74 | 8,314                           |
| Sulfadiazine           | 50*                                | 0,999005             | 5,021   | 0,056/0,168                                                  | 2,30 / 2,85                                     | 95,47        | 100,96 | 105,34 | 2,06                   | 2,42                   | 0,99                             | 1,21 | 6,368                           |
| Sulfathiazole          | 50*                                | 0,998935             | 6,494   | 0,207/0,621                                                  | 7,64 / 9,45                                     | 93,44        | 100,51 | 105,55 | 2,95                   | 2,99                   | 0,96                             | 1,50 | 8,060                           |
| Sulfapyridine          | 50*                                | 0,999170             | 5,594   | 0,144/0,432                                                  | 5,58 / 6,90                                     | 92,56        | 99,78  | 105,89 | 2,41                   | 2,65                   | 1,22                             | 1,34 | 6,936                           |
| Sulfamerazine          | 50*                                | 0,998653             | 4,925   | 0,100/0,300                                                  | 4,37 / 5,40                                     | 95,40        | 100,10 | 105,89 | 1,78                   | 3,39                   | 0,68                             | 1,70 | 6,660                           |
| Sulfamethazine         | 50*                                | 0,999088             | 4,681   | 0,046/0,138                                                  | 2,16 / 2,67                                     | 96,10        | 99,61  | 105,01 | 1,54                   | 1,70                   | 0,42                             | 0,83 | 5,546                           |
| Sulfamethizole         | 50*                                | 0,999353             | 5,664   | 0,137/0,411                                                  | 3,53 / 4,37                                     | 96,64        | 100,45 | 104,20 | 2,09                   | 2,59                   | 1,07                             | 1,30 | 6,866                           |
| Sulfamethoxypyridazine | 50*                                | 0,999091             | 4,028   | 0,207/0,621                                                  | 5,59 / 6,91                                     | 96,89        | 99,75  | 104,61 | 1,43                   | 1,45                   | 0,66                             | 0,72 | 4,868                           |
| Sulfamonomethoxine     | 50*                                | 0,999160             | 4,915   | 0,231/0,693                                                  | 5,94 / 7,35                                     | 96,03        | 99,50  | 105,92 | 2,55                   | 2,87                   | 0,81                             | 1,44 | 6,996                           |
| Sulfameter             | 50*                                | 0,999627             | 3,162   | 0,407/1,221                                                  | 9,36 / 11,57                                    | 95,06        | 99,98  | 104,91 | 3,37                   | 3,48                   | 1,59                             | 1,71 | 6,024                           |
| Sulfachloropyridazine  | 50*                                | 0,999248             | 4,660   | 0,174/0,522                                                  | 7,20 / 8,91                                     | 96,84        | 100,09 | 105,21 | 2,66                   | 2,97                   | 0,93                             | 1,52 | 6,618                           |
| Sulfadoxine            | 50*                                | 0,998408             | 3,782   | 0,045/0,135                                                  | 7,35 / 9,09                                     | 92,96        | 100,98 | 106,18 | 4,12                   | 4,18                   | 1,64                             | 2,12 | 7,226                           |
| Sulfamethoxazol        | 50*                                | 0,998884             | 3,799   | 0,134/0,402                                                  | 7,89 / 9,76                                     | 95,42        | 100,15 | 107,41 | 3,18                   | 3,22                   | 0,70                             | 1,61 | 6,334                           |
| Sulfisoxazole          | 50*                                | 0,998621             | 3,503   | 0,103/0,309                                                  | 7,87 / 9,74                                     | 96,20        | 100,47 | 107,62 | 3,47                   | 3,57                   | 0,67                             | 1,80 | 6,390                           |
| Sulfabenzamide         | 50*                                | 0,997895             | 3,671   | 0,282/0,846                                                  | 7,66 / 9,48                                     | 96,63        | 100,02 | 105,43 | 2,61                   | 2,70                   | 1,30                             | 1,37 | 5,706                           |
| Sulfadimethoxine       | 50*                                | 0,999087             | 4,038   | 0,059/0,177                                                  | 7,61 / 9,42                                     | 95,91        | 99,32  | 104,14 | 2,80                   | 2,85                   | 0,73                             | 1,42 | 5,990                           |
| Sulfaquinoxaline       | 50*                                | 0,999144             | 3,616   | 0,174/0,522                                                  | 8,22 / 10,16                                    | 96,08        | 99,92  | 103,87 | 2,91                   | 3,19                   | 1,30                             | 1,61 | 6,106                           |
| Sulfaphenazole         | 50*                                | 0,998246             | 3,958   | 0,190/0,570                                                  | 8,34 / 10,32                                    | 94,59        | 99,10  | 104,63 | 2,81                   | 2,97                   | 1,43                             | 1,47 | 6,120                           |
| Sulfanitran            | 50*                                | 0,998272             | 7,444   | 0,304/0,912                                                  | 9,52 / 11,77                                    | 95,60        | 99,13  | 105,32 | 3,04                   | 3,30                   | 1,13                             | 1,62 | 8,968                           |
| Trimethoprim           | 50*                                | 0,997446             | 8,465   | 0,045/0,135                                                  | 7,67 / 9,48                                     | 92,88        | 100,15 | 105,17 | 3,42                   | 3,54                   | 1,70                             | 1,77 | 9,970                           |
| Dapsone                | 5*                                 | 0,997922             | 7,831   | 0,183/0,549                                                  | 2,45 / 3,03                                     | 96,00        | 100,10 | 103,22 | 1,72                   | 1,88                   | 0,05                             | 0,10 | 0,842                           |
