# Supplementary material for: Development and Validation of an Analytical Method for the Simultaneous Detection of Sulfonamides, Trimethoprim and Dapsone in Honey by Liquid Chromatography-Tandem Mass Spectrometry
Source: Preprints.org preprint supplement (doi:10.20944/preprints202312.1801.v2), 2024-03-25
Supplement: Supplementary file 1 [file supplementary]

Table S2. The values of performance parameters obtained through the internal validation of the method

| **Compound** | **Level of compund (µg/kg)(MRPL)** | **HONEY SAMPLES** | | | | | | | | | | | |
| --- | --- | --- | --- | --- | --- | --- | --- | --- | --- | --- | --- | --- | --- |
| **Linearity** | | **Limit of detection/ Limit of quantification (µg/kg)** | **CCα/ CCβ (µg/kg)** | **Recovery (%)** | | | **Repeatability (%)** | **Reproducibility (%)** | **Robustness** | | **Uncertainty (k═2)(µg/kg)** |
| **R2≥0,99** | **RSD<15%** | **LOD<MRPL; LOQ<MRPL** | **CCα<MRPL; CCβ<MRPL** | **80%<R<120%** | | | **RSDr ≤ 20%** | **RSDR ≤ 20%** | **SDi < SR** | | **Ue < Uf** |
| **Min.** | **Medie** | **Max.** |
| **Sulfaguanidine** | **50*** | 0,998962 | 7,335 | 1,020/3,060 | 3,50 / 4,33 | 93,52 | 99,99 | 103,99 | 2,65 | 3,08 | 1,42 | 1,55 | 8,772 |
| **Sulfacetamide** | **50*** | 0,996751 | 7,574 | 1,095/3,285 | 2,44 / 3,02 | 96,07 | 100,36 | 103,79 | 2,55 | 2,85 | 1,05 | 1,42 | 8,618 |
| **Sulfanilamide** | **50*** | 0,996611 | 11,280 | 12,50/37,50 | 22,12 / 27,36 | 96,09 | 99,87 | 105,96 | 3,26 | 3,34 | 1,28 | 1,67 | 12,310 |
| **Sulfisomidine** | **50*** | 0,998490 | 6,519 | 0,066/0,198 | 7,78 / 9,62 | 92,84 | 100,25 | 104,31 | 3,42 | 3,47 | 1,72 | 1,74 | 8,314 |
| **Sulfadiazine** | **50*** | 0,999005 | 5,021 | 0,056/0,168 | 2,30 / 2,85 | 95,47 | 100,96 | 105,34 | 2,06 | 2,42 | 0,99 | 1,21 | 6,368 |
| **Sulfathiazole** | **50*** | 0,998935 | 6,494 | 0,207/0,621 | 7,64 / 9,45 | 93,44 | 100,51 | 105,55 | 2,95 | 2,99 | 0,96 | 1,50 | 8,060 |
| **Sulfapyridine** | **50*** | 0,999170 | 5,594 | 0,144/0,432 | 5,58 / 6,90 | 92,56 | 99,78 | 105,89 | 2,41 | 2,65 | 1,22 | 1,34 | 6,936 |
| **Sulfamerazine** | **50*** | 0,998653 | 4,925 | 0,100/0,300 | 4,37 / 5,40 | 95,40 | 100,10 | 105,89 | 1,78 | 3,39 | 0,68 | 1,70 | 6,660 |
| **Sulfamethazine** | **50*** | 0,999088 | 4,681 | 0,046/0,138 | 2,16 / 2,67 | 96,10 | 99,61 | 105,01 | 1,54 | 1,70 | 0,42 | 0,83 | 5,546 |
| **Sulfamethizole** | **50*** | 0,999353 | 5,664 | 0,137/0,411 | 3,53 / 4,37 | 96,64 | 100,45 | 104,20 | 2,09 | 2,59 | 1,07 | 1,30 | 6,866 |
| **Sulfamethoxypyridazine** | **50*** | 0,999091 | 4,028 | 0,207/0,621 | 5,59 / 6,91 | 96,89 | 99,75 | 104,61 | 1,43 | 1,45 | 0,66 | 0,72 | 4,868 |
| **Sulfamonomethoxine** | **50*** | 0,999160 | 4,915 | 0,231/0,693 | 5,94 / 7,35 | 96,03 | 99,50 | 105,92 | 2,55 | 2,87 | 0,81 | 1,44 | 6,996 |
| **Sulfameter** | **50*** | 0,999627 | 3,162 | 0,407/1,221 | 9,36 / 11,57 | 95,06 | 99,98 | 104,91 | 3,37 | 3,48 | 1,59 | 1,71 | 6,024 |
| **Sulfachloropyridazine** | **50*** | 0,999248 | 4,660 | 0,174/0,522 | 7,20 / 8,91 | 96,84 | 100,09 | 105,21 | 2,66 | 2,97 | 0,93 | 1,52 | 6,618 |
| **Sulfadoxine** | **50*** | 0,998408 | 3,782 | 0,045/0,135 | 7,35 / 9,09 | 92,96 | 100,98 | 106,18 | 4,12 | 4,18 | 1,64 | 2,12 | 7,226 |
| **Sulfamethoxazol** | **50*** | 0,998884 | 3,799 | 0,134/0,402 | 7,89 / 9,76 | 95,42 | 100,15 | 107,41 | 3,18 | 3,22 | 0,70 | 1,61 | 6,334 |
| **Sulfisoxazole** | **50*** | 0,998621 | 3,503 | 0,103/0,309 | 7,87 / 9,74 | 96,20 | 100,47 | 107,62 | 3,47 | 3,57 | 0,67 | 1,80 | 6,390 |
| **Sulfabenzamide** | **50*** | 0,997895 | 3,671 | 0,282/0,846 | 7,66 / 9,48 | 96,63 | 100,02 | 105,43 | 2,61 | 2,70 | 1,30 | 1,37 | 5,706 |
| **Sulfadimethoxine** | **50*** | 0,999087 | 4,038 | 0,059/0,177 | 7,61 / 9,42 | 95,91 | 99,32 | 104,14 | 2,80 | 2,85 | 0,73 | 1,42 | 5,990 |
| **Sulfaquinoxaline** | **50*** | 0,999144 | 3,616 | 0,174/0,522 | 8,22 / 10,16 | 96,08 | 99,92 | 103,87 | 2,91 | 3,19 | 1,30 | 1,61 | 6,106 |
| **Sulfaphenazole** | **50*** | 0,998246 | 3,958 | 0,190/0,570 | 8,34 / 10,32 | 94,59 | 99,10 | 104,63 | 2,81 | 2,97 | 1,43 | 1,47 | 6,120 |
| **Sulfanitran** | **50*** | 0,998272 | 7,444 | 0,304/0,912 | 9,52 / 11,77 | 95,60 | 99,13 | 105,32 | 3,04 | 3,30 | 1,13 | 1,62 | 8,968 |
| **Trimethoprim** | **50*** | 0,997446 | 8,465 | 0,045/0,135 | 7,67 / 9,48 | 92,88 | 100,15 | 105,17 | 3,42 | 3,54 | 1,70 | 1,77 | 9,970 |
| **Dapsone** | **5*** | 0,997922 | 7,831 | 0,183/0,549 | 2,45 / 3,03 | 96,00 | 100,10 | 103,22 | 1,72 | 1,88 | 0,05 | 0,10 | 0,842 |
