# Supplementary material for: Development and Validation of an Analytical Method for the Simultaneous Detection of Sulfonamides, Trimethoprim and Dapsone in Honey by Liquid Chromatography-Tandem Mass Spectrometry
Source: Preprints.org preprint supplement (doi:10.20944/preprints202312.1801.v2), 2024-03-25
Supplement: Supplementary file 2 [file supplementary]

Table S1. Fragmentation conditions for the target compounds

| Analyte                                                                                              | Chemical formula                                                                            | Relative retention time (min) | Precursor ion (m/z) | Product ion |              | Collision energy (eV) |              | Internal standard used            |
|------------------------------------------------------------------------------------------------------|---------------------------------------------------------------------------------------------|-------------------------------|---------------------|-------------|--------------|-----------------------|--------------|-----------------------------------|
|                                                                                                      |                                                                                             |                               |                     | Quantifier  | Confirmation | Quantifier            | Confirmation |                                   |
| Sulfacetamide SAA                                                                                    | C <sub>8</sub> H <sub>10</sub> N <sub>2</sub> O <sub>3</sub> S                              | 1.9                           | 215                 | 156         | 108          | 10                    | 15           | SMT- <sup>13</sup> C <sub>6</sub> |
| Sulfaguanidine SGD                                                                                   | C <sub>7</sub> H <sub>10</sub> N <sub>4</sub> O <sub>2</sub> S                              | 1.9                           | 215                 | 156         | 92           | 10                    | 22           | SMT- <sup>13</sup> C <sub>6</sub> |
| Sulfanilamide SAM                                                                                    | C <sub>6</sub> H <sub>8</sub> N <sub>2</sub> O <sub>2</sub> S                               | 2.4                           | 173                 | 156         | 93           | 10                    | 15           | SMT- <sup>13</sup> C <sub>6</sub> |
| Sulfisomidine SSD                                                                                    | C <sub>12</sub> H <sub>14</sub> N <sub>4</sub> O <sub>2</sub> S                             | 3.3                           | 279                 | 186         | 124          | 15                    | 20           | SMT- <sup>13</sup> C <sub>6</sub> |
| Sulfadiazine SDZ                                                                                     | C <sub>10</sub> H <sub>10</sub> N <sub>4</sub> O <sub>2</sub> S                             | 4.8                           | 251                 | 108         | 156          | 20                    | 15           | SMT- <sup>13</sup> C <sub>6</sub> |
| Sulfathiazole STZ                                                                                    | C <sub>9</sub> H <sub>9</sub> N <sub>3</sub> O <sub>2</sub> S <sub>2</sub>                  | 5.5                           | 256                 | 156         | 92           | 15                    | 25           | SMT- <sup>13</sup> C <sub>6</sub> |
| Sulfapyridine SPD                                                                                    | C <sub>5</sub> H <sub>5</sub> N                                                             | 5.6                           | 250                 | 108         | 156          | 25                    | 15           | SMT- <sup>13</sup> C <sub>6</sub> |
| Sulfamerazine SMR                                                                                    | C <sub>11</sub> H <sub>12</sub> N <sub>4</sub> O <sub>2</sub> S                             | 6.2                           | 265                 | 172         | 156          | 15                    | 15           | SMT- <sup>13</sup> C <sub>6</sub> |
| Sulfamethazine SMT                                                                                   | C <sub>12</sub> H <sub>14</sub> N <sub>4</sub> O <sub>2</sub> S                             | 7.3                           | 279                 | 124         | 186          | 20                    | 15           | SMT- <sup>13</sup> C <sub>6</sub> |
| Sulfamethizole SFZ                                                                                   | C <sub>9</sub> H <sub>10</sub> N <sub>4</sub> O <sub>2</sub> S <sub>2</sub>                 | 7.7                           | 271                 | 92          | 156          | 25                    | 10           | SMT- <sup>13</sup> C <sub>6</sub> |
| Sulfamethoxypyridazine SMP                                                                           | C <sub>11</sub> H <sub>12</sub> N <sub>4</sub> O <sub>3</sub> S                             | 7.8                           | 281                 | 92          | 156          | 25                    | 15           | SMT- <sup>13</sup> C <sub>6</sub> |
| Sulfamonomethoxine SMM                                                                               | C <sub>11</sub> H <sub>11</sub> N <sub>4</sub> NaO <sub>3</sub> S                           | 7.9                           | 281                 | 126         | 156          | 20                    | 15           | SMT- <sup>13</sup> C <sub>6</sub> |
| Sulfamer SME                                                                                         | C <sub>11</sub> H <sub>12</sub> N <sub>4</sub> O <sub>3</sub> S                             | 7.9                           | 281                 | 92          | 156          | 25                    | 20           | SMT- <sup>13</sup> C <sub>6</sub> |
| Sulfachloropyridazine                                                                                | C <sub>10</sub> H <sub>9</sub> ClN <sub>4</sub> O <sub>2</sub> S                            | 9.7                           | 285                 | 156         | 108          | 15                    | 20           | SMZ- <sup>13</sup> C <sub>6</sub> |
| Sulfadoxine SDX                                                                                      | C <sub>12</sub> H <sub>14</sub> N <sub>4</sub> O <sub>4</sub> S                             | 10.3                          | 311                 | 108         | 156          | 25                    | 15           | SMZ- <sup>13</sup> C <sub>6</sub> |
| Sulfamethoxazole SMZ                                                                                 | C <sub>10</sub> H <sub>11</sub> N <sub>3</sub> O <sub>3</sub> S                             | 10.7                          | 254                 | 92          | 156          | 25                    | 15           | SMZ- <sup>13</sup> C <sub>6</sub> |
| Sulfisoxazole SSX                                                                                    | C <sub>11</sub> H <sub>13</sub> N <sub>3</sub> O <sub>3</sub> S                             | 11.5                          | 268                 | 113         | 156          | 15                    | 10           | SMZ- <sup>13</sup> C <sub>6</sub> |
| Sulfabenzamide SBZ                                                                                   | C <sub>13</sub> H <sub>12</sub> N <sub>2</sub> O <sub>3</sub> S                             | 12.7                          | 277                 | 92          | 156          | 15                    | 15           | SMZ- <sup>13</sup> C <sub>6</sub> |
| Sulfadimethoxine SDM                                                                                 | C <sub>12</sub> H <sub>14</sub> N <sub>4</sub> O <sub>4</sub> S                             | 13.1                          | 311                 | 108         | 156          | 25                    | 18           | SMZ- <sup>13</sup> C <sub>6</sub> |
| Sulfaquinoxaline SQX                                                                                 | C <sub>14</sub> H <sub>12</sub> N <sub>4</sub> O <sub>2</sub> S                             | 13.2                          | 301                 | 92          | 156          | 25                    | 15           | SMZ- <sup>13</sup> C <sub>6</sub> |
| Sulfaphenazole SPZ                                                                                   | C <sub>15</sub> H <sub>14</sub> N <sub>4</sub> O <sub>2</sub> S                             | 13.55                         | 315                 | 108         | 159          | 25                    | 20           | SMZ- <sup>13</sup> C <sub>6</sub> |
| Sulfantran SNT                                                                                       | C <sub>14</sub> H <sub>13</sub> N <sub>3</sub> O <sub>5</sub> S                             | 16.4                          | 336                 | 134         | 156          | 25                    | 10           | SMZ- <sup>13</sup> C <sub>6</sub> |
| Dapsone DDS                                                                                          | C <sub>12</sub> H <sub>12</sub> N <sub>2</sub> O <sub>2</sub> S                             | 9.4                           | 249.2               | 92.1        | 156          | 22                    | 10           | SMZ- <sup>13</sup> C <sub>6</sub> |
| Trimethoprim TMP                                                                                     | C <sub>14</sub> H <sub>18</sub> N <sub>4</sub> O <sub>3</sub>                               | 4.5                           | 291                 | 123         | 230          | 22                    | 20           | SMT- <sup>13</sup> C <sub>6</sub> |
| Sulfametazine- <sup>13</sup> C <sub>6</sub> SMT- <sup>13</sup> C <sub>6</sub> (internal standard)    | <sup>13</sup> C <sub>6</sub> C <sub>6</sub> H <sub>14</sub> N <sub>4</sub> O <sub>2</sub> S | 7.3                           | 285                 | 186         | -            | 15                    | -            | -                                 |
| Sulfamethoxazole- <sup>13</sup> C <sub>6</sub> SMZ- <sup>13</sup> C <sub>6</sub> (internal standard) | <sup>13</sup> C <sub>6</sub> C <sub>4</sub> H <sub>11</sub> N <sub>3</sub> O <sub>3</sub> S | 10.7                          | 260                 | 162         | -            | 15                    | -            | -                                 |
